# Supplementary material
Source: MDPI journal article supplement (https://www.mdpi.com/search?q=inorganics-06-00112)
Supplement: s001 [file inorganics-06-00112-s001.pdf]

# Supplementary Materials: Effect of $[\text{Zr}(\alpha\text{-PW}_{11}\text{O}_{39})_2]^{10-}$ Polyoxometalate on the Self-Assembly of Surfactant Molecules in Water Studied by Fluorescence and DOSY NMR Spectroscopy

Thomas Quanten, Pavletta Shestakova, Aleksandar Kondinski and Tatjana N. Parac-Vogt

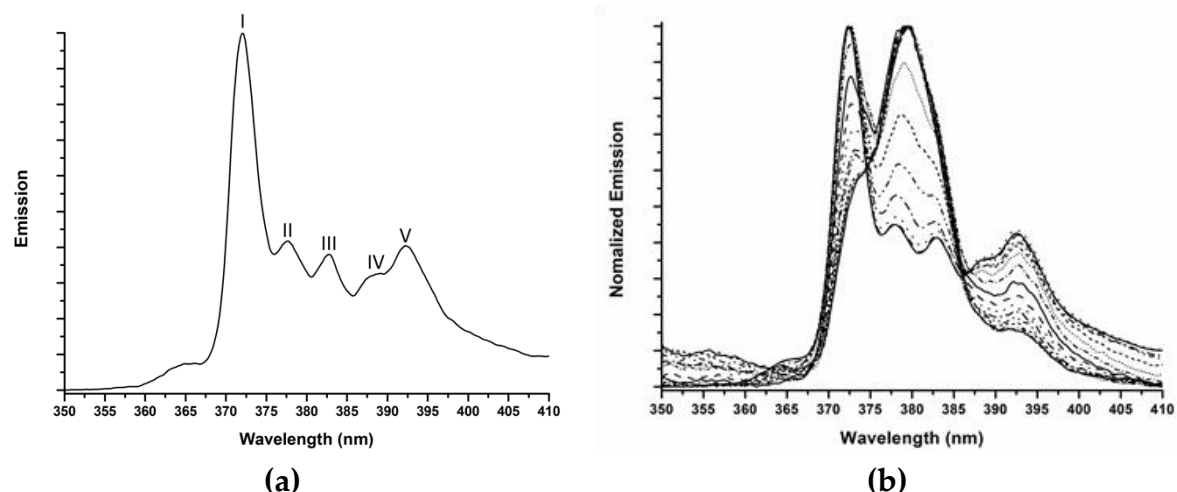

**Figure S1.** The emission spectra of: (a) saturated aqueous pyrene solution ( $2\text{--}3\ \mu\text{M}$ ) buffered at pH 7.4 by a 10 mM sodium phosphate solution. The vibronic peaks which are situated at 372, 378, 283, 389 and 392 nm are labeled I, II, III, IV and IV, respectively; (b) The normalized emission of a saturated pyrene solution ( $2\text{--}3\ \mu\text{M}$ ) buffered at pH 7.4 by a 10 mM sodium phosphate solutions in the presence of increasing concentrations of Zw3-12. Notice the coalescence of peak II and III and peak IV and V.

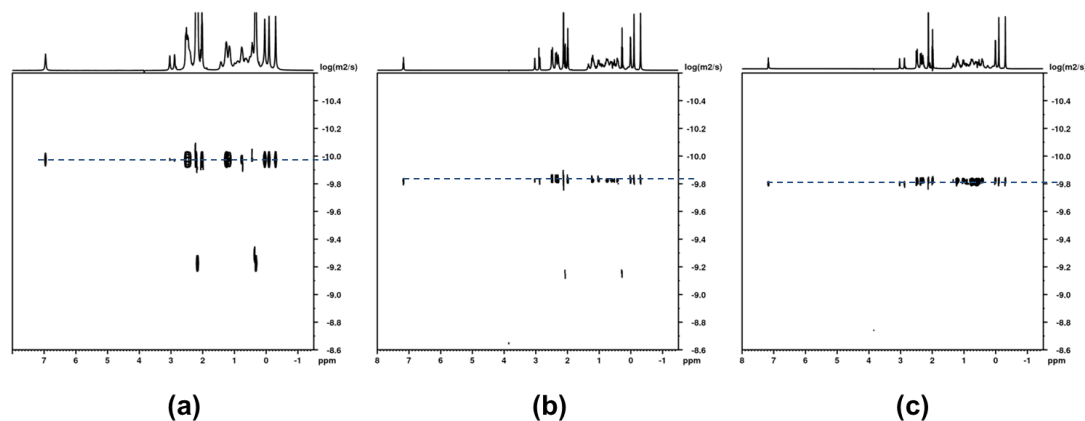

**Figure S2.**  $^1\text{H}$  DOSY spectra of: (a) CHAPS/1 mixture; (b) CHAPS/ $\text{Et}_2\text{NH}_2\text{Cl}$  mixture; (c) CHAPS.

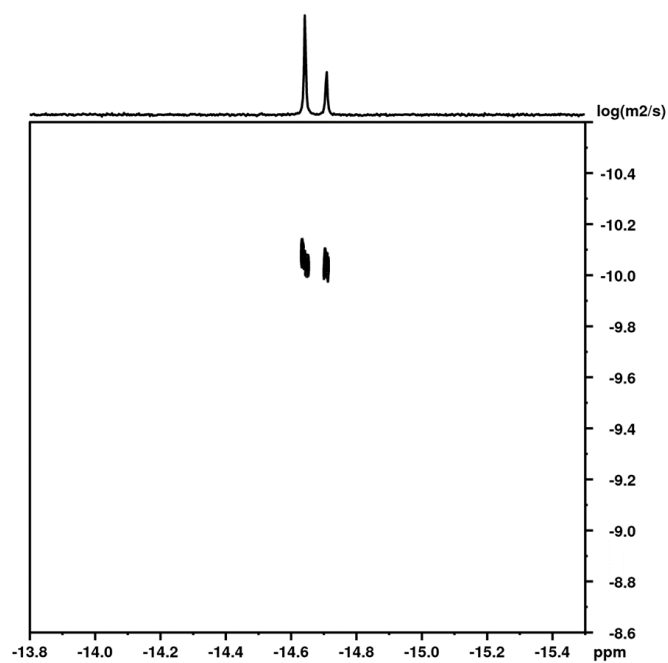

Figure S3. CHAPS/1— $^{31}\text{P}$  DOSY.

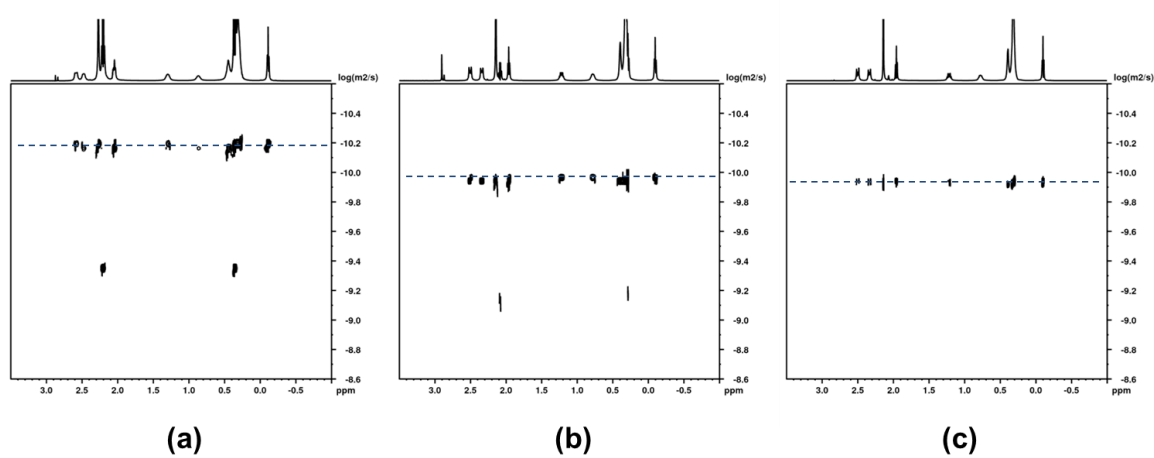

Figure S4.  $^1\text{H}$  DOSY spectra of: (a) Zw3-12/1 mixture; (b) Zw3-12/ $\text{Et}_2\text{NH}_2\text{Cl}$  mixture; (c) Zw3-12.

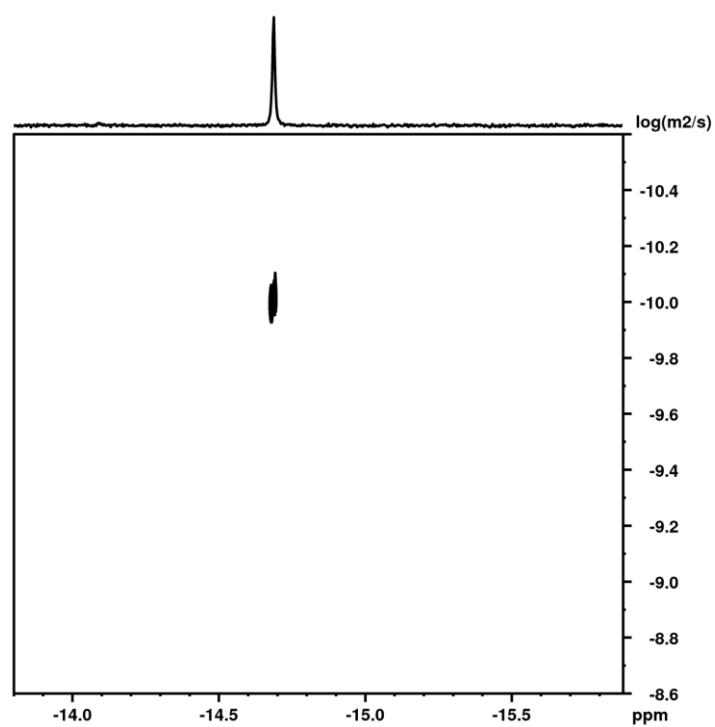

Figure S5. Zw3-12/1 mixture—<sup>31</sup>P DOSY.

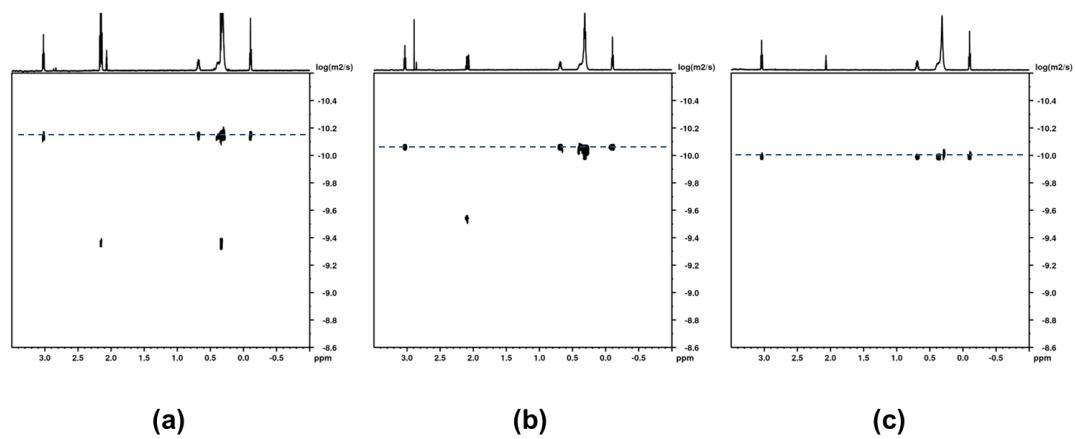

Figure S6. <sup>1</sup>H DOSY spectra of: (a) SDS/1 mixture; (b) SDS/Et<sub>3</sub>NH<sub>2</sub>Cl mixture; (c) SDS.

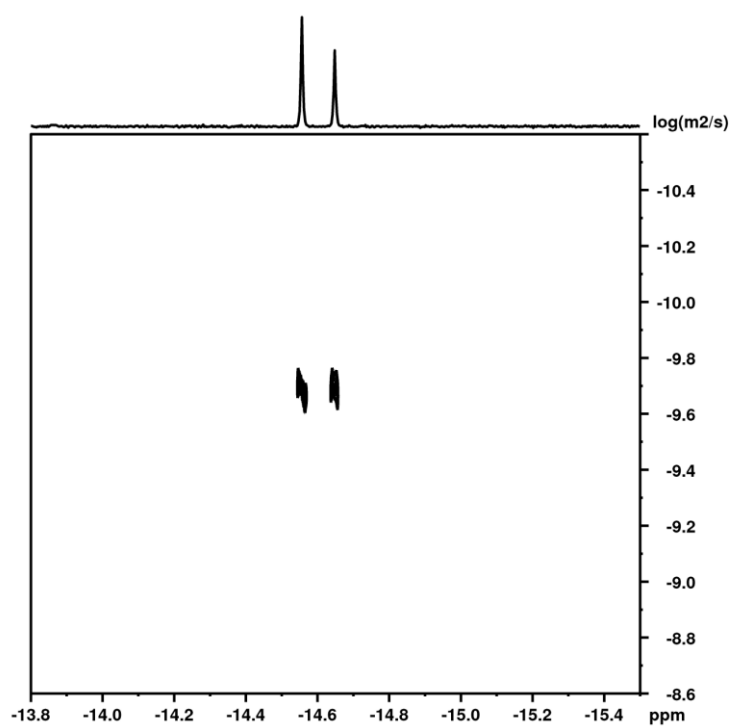

Figure S7. SDS/1 mixture— $^{31}\text{P}$  DOSY.

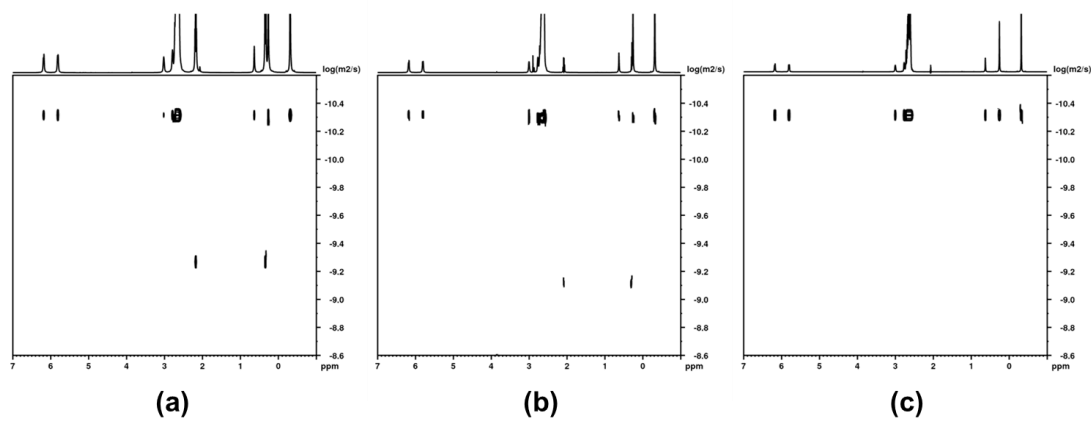

Figure S8.  $^1\text{H}$  DOSY spectra of: (a) TX100/1 mixture; (b) TX100/ $\text{Et}_3\text{NH}_2\text{Cl}$  mixture; (c) TX100.

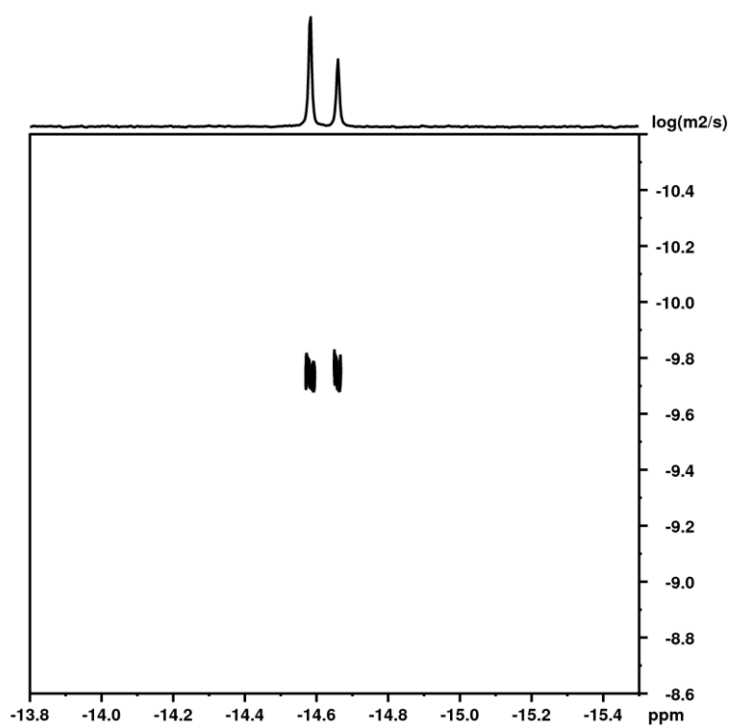

Figure S9. TX100/1 mixture— $^{31}\text{P}$  DOSY.

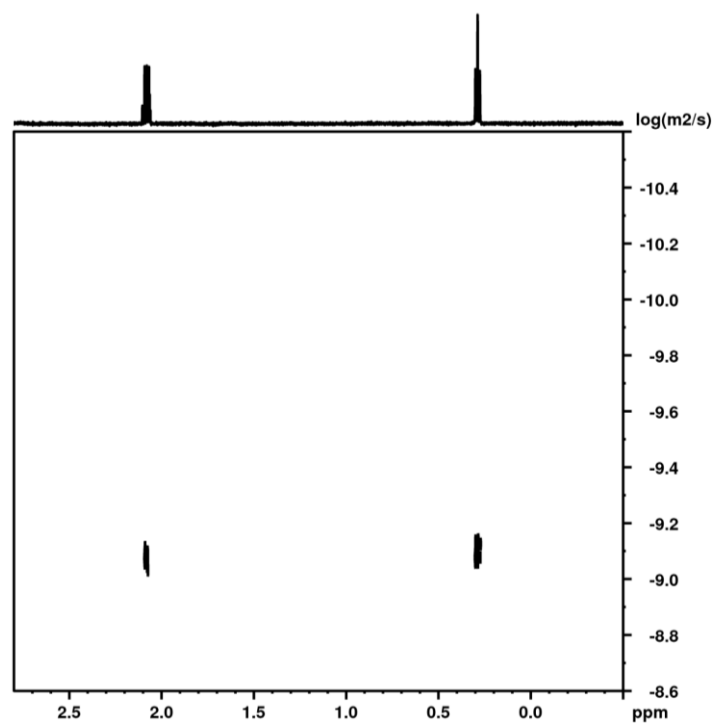

Figure S10.  $^1\text{H}$  DOSY  $\text{Et}_2\text{NH}_2\text{Cl}$ .

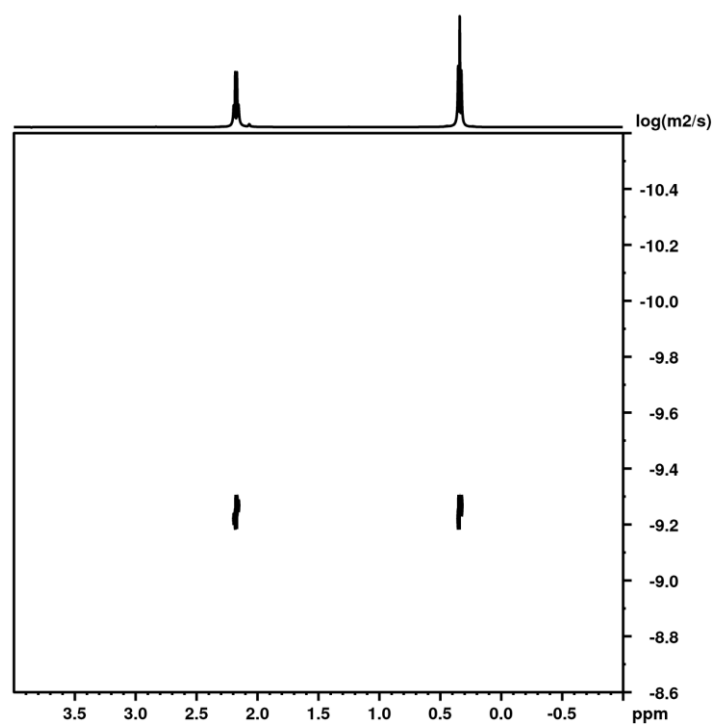Figure S11.  $^1\text{H}$  DOSY of 1.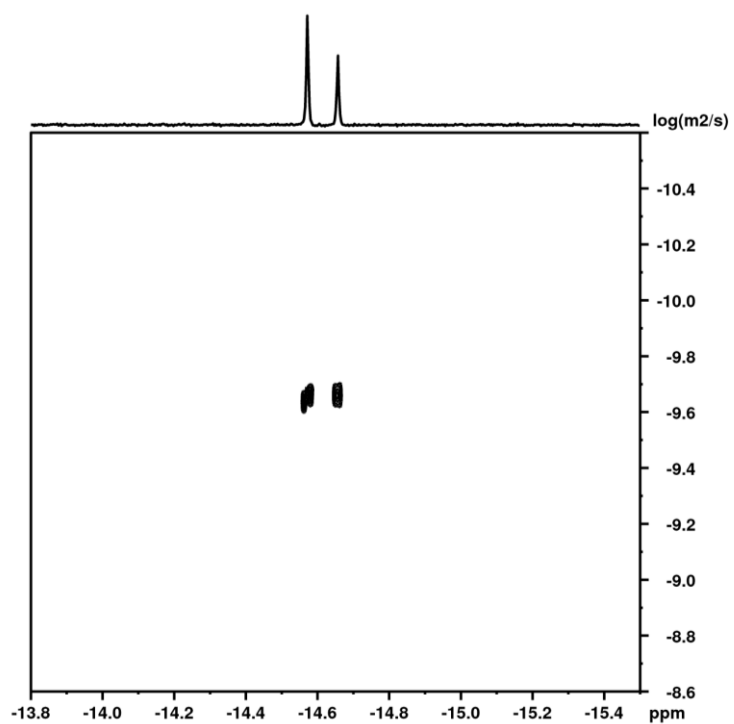Figure S12.  $^{31}\text{P}$  DOSY of 1.
